# Supplementary material for: Efficacy of detergent-based cleaning methods against coronavirus MHV-A59 on porous and non-porous surfaces
Source: PubMed Central journal article supplement (PMC8965596; doi:10.1080/15459624.2021.2015075), 2022-01-28
Supplement: NIHMS1788369-supplement-Supplementary_Material.pdf [file NIHMS1788369-supplement-Supplementary_Material.pdf]

# Efficacy of Detergent-Based Cleaning Methods Against Coronavirus MHV-A59 on Porous and Non-Porous Surfaces – Supplemental Materials

Table S1. Cytotoxicity of Coupon Materials.

| <b>Material</b> | <b>Average Percent Cytotoxicity (%)<sup>a</sup></b> | <b>Stdev</b> |
|-----------------|-----------------------------------------------------|--------------|
| <b>Formica</b>  | 3.20                                                | 7.14         |
| <b>ABS</b>      | 0.47                                                | 2.40         |
| <b>SS</b>       | -0.93                                               | 1.32         |
| <b>Fabric</b>   | 1.04                                                | 4.88         |

<sup>a</sup> Percent cytotoxicity relative to maximum LDH release in lysed control wells.

## Efficacy of Detergent-Based Cleaning Methods Against Coronavirus MHV-A59 on Porous and Non-Porous Surfaces – Supplemental Materials

Table S2. Recovery of MHV-A59 in Culture Medium

| Material       | Inoculum Volume per Coupon (mL) | Recovery (Log <sub>10</sub> TCID <sub>50</sub> per Coupon) |              |            |              | Log Reduction from T0 | Adjusted P Value <sup>a</sup> (T2 vs. T0) | Percent Inoculum Recovered at T0 (%) |
|----------------|---------------------------------|------------------------------------------------------------|--------------|------------|--------------|-----------------------|-------------------------------------------|--------------------------------------|
|                |                                 | T0                                                         |              | T2         |              |                       |                                           |                                      |
|                |                                 | <i>Avg</i>                                                 | <i>Stdev</i> | <i>Avg</i> | <i>Stdev</i> |                       |                                           |                                      |
| <b>Formica</b> | 0.1                             | 6.07                                                       | 0.63         | 5.48       | 0.46         | 0.60                  | 0.115                                     | 95.30                                |
| <b>ABS</b>     | 0.1                             | 6.33                                                       | 0.07         | 5.55       | 0.21         | 0.78                  | 0.103                                     | 99.37                                |
| <b>SS</b>      | 0.1                             | 5.98                                                       | 0.45         | 6.08       | 0.36         | -0.10                 | 0.992                                     | 93.87                                |
| <b>Fabric</b>  | 0.1                             | 6.32                                                       | 0.11         | 5.05       | 0.33         | 1.27                  | 0.001                                     | 98.43                                |

<sup>a</sup> Two-way ANOVA, Sidak's Multiple Comparisons Test

## Efficacy of Detergent-Based Cleaning Methods Against Coronavirus MHV-A59 on Porous and Non-Porous Surfaces – Supplemental Materials

Table S3. Recovery of MHV-A59 in Simulated Saliva

| Material       | Inoculum Volume per Coupon (mL) | Recovery (Log <sub>10</sub> TCID <sub>50</sub> per Coupon) |              |            |              | Log Reduction from T0 | Adjusted P Value <sup>a</sup> (T2 vs. T0) | Percent Inoculum Recovered at T0 (%) <sup>b</sup> |
|----------------|---------------------------------|------------------------------------------------------------|--------------|------------|--------------|-----------------------|-------------------------------------------|---------------------------------------------------|
|                |                                 | T0                                                         |              | T2         |              |                       |                                           |                                                   |
|                |                                 | <i>Avg</i>                                                 | <i>Stdev</i> | <i>Avg</i> | <i>Stdev</i> |                       |                                           |                                                   |
| <b>Formica</b> | 0.1                             | 6.52                                                       | 0.03         | 5.34       | 0.04         | 1.18                  | <0.0001                                   | 119.10                                            |
| <b>ABS</b>     | 0.1                             | 6.28                                                       | 0.12         | 5.73       | 0.09         | 0.55                  | <0.0001                                   | 82.42                                             |
| <b>SS</b>      | 0.1                             | 6.53                                                       | 0.25         | 5.98       | 0.09         | 0.55                  | <0.0001                                   | 158.00                                            |
| <b>Fabric</b>  | 0.1                             | 6.10                                                       | 0.08         | 5.09       | 0.05         | 1.01                  | <0.0001                                   | 170.45                                            |

<sup>a</sup> Two-way ANOVA, Sidak's Multiple Comparisons Test; <sup>b</sup> Average percent recovery from calculated TCID<sub>50</sub> value inoculum per coupon; n=3 per test.

## Efficacy of Detergent-Based Cleaning Methods Against Coronavirus MHV-A59 on Porous and Non-Porous Surfaces – Supplemental Materials

Table S4. Cleaning Efficacy of Dawn and Tide Plus Bleach Alternative against MHV-A59 in Cell Culture Media on Material Coupons<sup>a</sup>

|         | Dawn                  |                       | Tide                  |                       | Hard Water  |              | Wipe Alone  |             |
|---------|-----------------------|-----------------------|-----------------------|-----------------------|-------------|--------------|-------------|-------------|
|         | T0 hr                 | T2 hr                 | T0 hr                 | T2 hr                 | T0 hr       | T2 hr        | T0 hr       | T2 hr       |
| Formica | 1.75 ± 0.21<br>(4.41) | 2.77 ± 1.16<br>(4.41) | 2.68 ± 0.50<br>(4.82) | 2.85 ± 0.85<br>(4.09) | 1.69 ± 0.33 | 2.64 ± 0.32  | 2.76 ± 0.69 | 1.20 ± 0.54 |
| ABS     | 2.57 ± 0.29<br>(4.64) | 2.40 ± 0.47<br>(3.85) | 3.12 ± 0.75<br>(4.64) | 2.79 ± 0.92<br>(3.85) | 3.53 ± 0.99 | 2.87 ± 0.53  | 2.93 ± 0.31 | 2.06 ± 0.45 |
| SS      | 2.35 ± 0.21<br>(4.59) | 2.18 ± 0.16<br>(3.99) | 2.92 ± 1.27<br>(4.71) | 3.30 ± 0.72<br>(4.07) | 2.49 ± 0.32 | 1.70 ± 0.17  | 2.31 ± 0.35 | 1.37 ± 0.04 |
| Fabric  | 0.60 ± 0.32<br>(4.52) | 0.04 ± 0.32<br>(3.18) | 0.90 ± 0.37<br>(4.62) | 0.10 ± 0.05<br>(3.47) | 0.73 ± 0.26 | 0.002 ± 0.17 | 1.45 ± 0.49 | 0.03 ± 0.25 |

<sup>a</sup> The dynamic range for each test is included in parentheses. Data are presented as mean log<sub>10</sub> reduction ± log<sub>10</sub> standard deviation. The dynamic range (log<sub>10</sub>) is indicated in parentheses for test samples (detergents). For hard water and wipe alone controls, data reflects the mean and standard deviation values across both Dawn and Tide tests.

## Efficacy of Detergent-Based Cleaning Methods Against Coronavirus MHV-A59 on Porous and Non-Porous Surfaces – Supplemental Materials

**Table S5. Cleaning Efficacy of Dawn and Tide with Bleach Alternative against MHV-A59 in Simulated Saliva on Material Coupons <sup>a</sup>**

|         | Dawn                  |                       | Tide                  |                       | Hard Water     |             | Wipe Alone     |                 |
|---------|-----------------------|-----------------------|-----------------------|-----------------------|----------------|-------------|----------------|-----------------|
|         | 0 hr                  | 2 hr                  | 0 hr                  | 2 hr                  | 0 hr           | 2 hr        | 0 hr           | 2 hr            |
| Formica | 1.84 ± 0.50<br>(4.82) | 3.12 ± 0.84<br>(3.65) | 2.82 ± 1.21<br>(4.82) | 2.95 ± 0.68<br>(3.65) | 1.55 ±<br>0.18 | 1.36 ± 0.14 | 2.38 ±<br>0.20 | 0.74 ± 0.52     |
| ABS     | 2.60 ± 0.61<br>(4.58) | 3.16 ± 1.03<br>(4.03) | 2.65 ± 0.65<br>(4.58) | 2.29 ± 0.17<br>(4.03) | 1.40 ±<br>0.59 | 2.07 ± 0.17 | 3.24 ±<br>0.42 | 1.06 ± 0.64     |
| SS      | 2.42 ± 0.30<br>(4.83) | 2.60 ± 0.16<br>(4.28) | 3.02 ± 0.63<br>(4.83) | 2.34 ± 0.63<br>(4.28) | 2.21 ±<br>0.21 | 2.21 ± 0.23 | 2.64 ±<br>0.44 | 1.43 ± 0.33     |
| Fabric  | 1.06 ± 0.08<br>(4.40) | 0.48 ± 0.21<br>(3.40) | 0.82 ± 0.08<br>(4.40) | 0.38 ± 0.36<br>(3.40) | 0.66 ±<br>0.10 | 0.24 ± 0.27 | 1.48 ±<br>0.32 | -0.09 ±<br>0.16 |

<sup>a</sup> The dynamic range for each test is included in parentheses. Data are presented as mean log<sub>10</sub> reduction ± log<sub>10</sub> standard deviation. The dynamic range (log<sub>10</sub>) is indicated in parentheses for test samples (detergents). For hard water and wipe alone controls, data reflects the mean and standard deviation values across both Dawn and Tide tests.
